# Supplementary material
Source: publisher figshare collection journal article supplement (https://gsajournals.figshare.com/ndownloader/files/23763938)
Supplement: Supplementary file 1 [file 23763938]

## Sheet: Sheet1
Ear Height (cm)
Model	BIC	Runtime	VA	VD	VI	VEnv	VAxE	VDxE	VIxE
Independent Hybrid Effects (IDVG)
E + G + GxE	89173.9	00:00:02			141.695	303.58			25.64
CorUH	NA	NA			NA	NA			NA
E + G(E) + FA(1)	88868.2	00:00:18			122.568	295.646			27.8914
E + G(E) + FA(2)	89177.2	00:01:55			116.317	294.32			30.041
E + G(E) + FA(3)	89573.8	00:04:00			114.442	292.006			33.9374
Additive (A) genomic relationships + dominance (D) genomic relationships + independent hybrid effects (I)
E + A + D + I + AxE +DxE + IxE	86032.2	00:25:10	115.294	18.081	6.49452	320.238	13.1561	9.63791	6.94734
Plant Height (cm)
Model	BIC	Runtime	VA	VD	VI	VEnv	VAxE	VDxE	VIxE
Independent Hybrid Effects (IDVG)
E + G + GxE	94641.1	00:00:01			239.713	806.247			43.8256
CorUH	NA	NA			NA	NA			NA
E + G(E) + FA(1)	93797.6	00:00:20			194.383	794.76			50.0805
E + G(E) + FA(2)	94033.3	00:01:54			184.017	794.327			54.6023
E + G(E) + FA(3)	94400.9	00:03:27			182.443	789.843			58.6458
Additive (A) genomic relationships + dominance (D) genomic relationships + independent hybrid effects (I)
E + A + D + I + AxE +DxE + IxE	90740.6	00:25:02	193.008	26.0273	6.32277	817.647	26.9736	12.161	12.5374
Grain Moisture
Model	BIC	Runtime	VA	VD	VI	VEnv	VAxE	VDxE	VIxE
Independent Hybrid Effects (IDVG)
E + G + GxE	32274.3	00:00:02			2.84608	21.5866			1.08848
CorUH	NA	NA			NA	NA			NA
E + G(E) + FA(1)	24125.7	00:00:35			4.35488	24.1601			2.95766
E + G(E) + FA(2)	24195.3	00:03:02			4.1636	24.5937			3.0415
E + G(E) + FA(3)	24568.3	00:08:34			3.80394	23.8562			2.86764
Additive (A) genomic relationships + dominance (D) genomic relationships + independent hybrid effects (I)
E + A + D + I + AxE +DxE + IxE	22900.8	00:33:43	1.31126	0.148012	0.0659557	23.0073	0.952646	0.316311	2.45395e-07
Lodging
Model	BIC	Runtime	VA	VD	VI	VEnv	VAxE	VDxE	VIxE
Independent Hybrid Effects (IDVG)
E + G + GxE	-51159.3	00:00:01			0.00188917	0.0132689			0.0030282
CorUH	NA	NA			NA	NA			NA
E + G(E) + FA(1)	-55350.2	00:00:22			0.00397374	0.0141933			0.00804117
E + G(E) + FA(2)	-55229.9	00:02:33			0.00373624	0.0139282			0.00813978
E + G(E) + FA(3)	-54925.2	00:05:25			0.00348662	0.0145058			0.00844762
Additive (A) genomic relationships + dominance (D) genomic relationships + independent hybrid effects (I)
E + A + D + I + AxE +DxE + IxE	-55207.4	00:24:03	0.00270323	0.00029131	6.11935e-07	0.0132255	0.0028525	0.00202707	1.56008e-05
Days to Anthesis (DTA)
Model	BIC	Runtime	VA	VD	VI	VEnv	VAxE	VDxE	VIxE
Independent Hybrid Effects (IDVG)
E + G + GxE	30676	00:00:01			9.76102	76.0041			1.09523
CorUH	NA	NA			NA	NA			NA
E + G(E) + FA(1)	28774.9	00:00:17			8.29594	77.4611			1.8343
E + G(E) + FA(2)	28879.6	00:01:17			8.18123	77.8371			1.94722
E + G(E) + FA(3)	29081.2	00:03:56			8.14487	78.038			1.91544
Additive (A) genomic relationships + dominance (D) genomic relationships + independent hybrid effects (I)
E + A + D + I + AxE +DxE + IxE	23841.1	00:23:46	3.83641	0.443638	0.0529834	75.4843	0.719	0.455323	0.124772
Days to Silking (DTS)
Model	BIC	Runtime	VA	VD	VI	VEnv	VAxE	VDxE	VIxE
Independent Hybrid Effects (IDVG)
E + G + GxE	31352.7	00:00:02			11.0739	73.1484			1.09172
CorUH	NA	NA			NA	NA			NA
E + G(E) + FA(1)	29538.3	00:00:18			9.79329	73.9304			1.81151
E + G(E) + FA(2)	29684.8	00:01:22			9.61908	73.9541			1.85669
E + G(E) + FA(3)	29929.9	00:02:59			9.61484	74.0456			1.93057
Additive (A) genomic relationships + dominance (D) genomic relationships + independent hybrid effects (I)
E + A + D + I + AxE +DxE + IxE	25095.8	00:23:36	4.44205	0.517515	0.064207	72.796	0.846289	0.452309	0.0894068
Test Weight (kg/m^3)
Model	BIC	Runtime	VA	VD	VI	VEnv	VAxE	VDxE	VIxE
Independent Hybrid Effects (IDVG)
E + G + GxE	44458.1	00:00:01			197.556	1748.52			164.255
CorUH	NA	NA			NA	NA			NA
E + G(E) + FA(1)	43742.4	00:00:06			179.492	1702.88			181.896
E + G(E) + FA(2)	43751.4	00:00:33			169.76	1694.17			192.515
E + G(E) + FA(3)	44039.6	00:01:53			158.397	1693.39			209.063
Additive (A) genomic relationships + dominance (D) genomic relationships + independent hybrid effects (I)
E + A + D + I + AxE +DxE + IxE	42397.4	00:19:35	188.85	24.8629	10.9201	1691.38	119.815	65.8383	7.73357
Yield (Mg/ha)
Model	BIC	Runtime	VA	VD	VI	VEnv	VAxE	VDxE	VIxE
Independent Hybrid Effects (IDVG)
E + G + GxE	33449.8	00:00:16			0.879	3.699			0.95
CorUH	FAIL	00:03:32				3.745			0.932
E + G(E) + FA(1)	32306.5	00:00:54			0.843	3.742			0.974
E + G(E) + FA(2)	32543.9	00:04:28			0.708	3.769			1.081
E + G(E) + FA(3)	32803.4	00:09:44			0.708	3.78			1.097
Additive (A) genomic relationships + independent hybrid effects (I)
E + A + I + AxE + IxE	29384	00:29:35	0.808		0.259	3.992	0.901		0.306
E + A(E) x FA(1) + I(Ediag)	30253	02:11:55	2.949			3.83	1.301		0.368
E + A(E) x FA(1) + I + IxE	29527.7	07:41:28	0.939		0.231	3.822	1.252		0.259
E + A(E) x FA(1) + I + I(Ediag)	29825	08:11:28	0.928		0.234	3.839	1.016		0.309
E + A(E) x FA(2) + I(Ediag)	30537.7	04:26:50	2.8		0.368	3.873	1.388		0.368
E + A(E) x FA(2) + I + IxE	29820.2	14:45:23	0.837		0.232	3.877	1.376		0.257
E + A(E) x FA(2) + I + I(Ediag)	30100	17:29:25	0.896		0.236	3.876	1.04		0.318
Dominance (D) genomic relationships + independent hybrid effects(I)
E + D + I + DxE + IxE	29102.9	00:30:22		0.533	0.108	3.678		0.93	0. 081
E + D(E) x FA(1) + I(Ediag)	29604.7	01:15:47		0.704		3.574		0.835
E + D(E) x FA(1) + I + IxE	29082.5	06:37:23		0.535	0.091	3.532		1.03	0.045
E + D(E) x FA(1) + I + I(Ediag)	29569.5	06:47:25		0.54	0.083	3.543		0.83	0.182
E + D(E) x FA(2) + I(Ediag)	29819.5	03:56:14		0.658		3.625		0.827	0.212
E + D(E) x FA(2) + I + IxE	29326.3	19:31:08		0.49	0.082	3.592		1.061	0.061
E + D(E) x FA(2) + I + I(Ediag)	29788	13:18:08		0.512	0.079	3.598		0.823	0.193
Additive (A) genomic relationships + dominance (D) genomic relationships + independent hybrid effects (I)
E + A + D + I + AxE +DxE + IxE	28913.6	00:29:30	0.513	0.25	0.102	3.81	0.532	0.453	0.148
E + A + D + AxE + DxE + I(Ediag)	28914.1	00:29:25	0.522	0.413		3.837	0.503	0.267	0.317
E + A + D + A(Ediag) + D(Ediag) + I(Ediag)	29802.3	01:33:19	0.436	0.243	0.097	3.777	0.58	0.382	0.214
